# Supplementary material
Source: PubMed Central journal article supplement (PMC6682094)
Supplement: ao9b01566_si_001.pdf [file ao9b01566_si_001.pdf]

# **$^{11}\text{B}$ NMR chemical shift predictions via Density Functional Theory and Gauge-Including Atomic Orbital approach: Applications to structural elucidations of boron-containing molecules**

Peng Gao<sup>a,b</sup>, Xingyong Wang<sup>a,b</sup>, Zhenguo Huang<sup>c</sup> and Haibo Yu<sup>a,b,d\*</sup>

<sup>a</sup> School of Chemistry and Molecular Bioscience, University of Wollongong, NSW 2522, Australia

<sup>b</sup> Molecular Horizons, University of Wollongong, NSW 2522, Australia

<sup>c</sup> School of Civil and Environmental Engineering, University of Technology Sydney, NSW 2007, Australia

<sup>d</sup> Illawarra Health and Medical Research Institute, Northfields Avenue, Wollongong, NSW 2522, Australia

\* Corresponding author: [hyu@uow.edu.au](mailto:hyu@uow.edu.au)

# 1. Development of the Linear Regression Models

## 1.1 Molecules included in the dataset

**Table S1.** The molecules and their experimental NMR chemical shifts in THF.

| Molecule# | Structure                                                                                                                                                                     | Exptl. $\delta$ (ppm) <sup>a</sup> |
|-----------|-------------------------------------------------------------------------------------------------------------------------------------------------------------------------------|------------------------------------|
| #1        | $\text{BF}_3 \cdot \text{THF}$                                                                                                                                                | -2.8                               |
| #2        | $\text{BF}_3 \cdot \text{Pydine}$                                                                                                                                             | -0.9                               |
| #3        | $\text{BCl}_3 \cdot \text{THF}$                                                                                                                                               | 10.2                               |
| #4        | $\text{BH}_3 \cdot \text{THF}$                                                                                                                                                | -1.1                               |
| #5        | $\text{LiBH}_4$                                                                                                                                                               | -42.0                              |
| #6        | $\text{LiB}(\text{NHMe})_4$                                                                                                                                                   | 0.2                                |
| #7        | 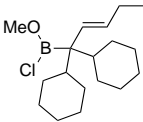                                                                                           | 30.5                               |
| #8        | $(t\text{-BuCO}_2)_2\text{BH}$                                                                                                                                                | 20.6                               |
| #9        | $[\text{Li}]^+ \left[ \begin{array}{c} \text{---} \\   \\ \text{n-Bu} \text{---} \text{B} \text{---} \\   \\ \text{n-Bu} \text{---} \\   \\ \text{---} \end{array} \right]^-$ | -15.2                              |
| #10       | $[\text{Li}]^+ \left[ \begin{array}{c} \text{---} \\   \\ \text{n-Bu} \text{---} \text{B} \text{---} \\   \\ \text{n-Bu} \text{---} \\   \\ \text{---} \end{array} \right]^-$ | -18.5                              |

|     |                                                                                                                                                       |       |
|-----|-------------------------------------------------------------------------------------------------------------------------------------------------------|-------|
| #11 | $[\text{Li}]^+ \left[ \begin{array}{c} \text{MeC} \equiv \text{B} \\ \text{MeC} \equiv \text{B} \end{array} \right]^-$                                | -18.4 |
| #12 | $[\text{Li}]^+ \left[ \begin{array}{c} \text{MeO} \text{---} \text{Et} \\ \text{MeC} \equiv \text{B} \\ \text{Et} \end{array} \right]^-$              | -2.2  |
| #13 | $[\text{Li}]^+ \left[ \begin{array}{c} \text{CN} \\ \text{B} \\ \text{OMe} \end{array} \right]^-$                                                     | -2.8  |
| #14 | $[\text{Li}]^+ \left[ \begin{array}{c} \text{H} \\ \text{B} \\ \text{C}_6\text{H}_{11} \end{array} \right]^-$                                         | -6.7  |
| #15 | $[\text{Li}]^+ \left[ \begin{array}{c} \text{H} \\ \text{B} \\ \text{C}_5\text{H}_9 \end{array} \right]^-$                                            | -9.7  |
| #16 | $[\text{Li}]^+ \left[ \begin{array}{c} \text{H} \\ \text{B} \\ \text{C}(\text{CH}_3)_2 \end{array} \right]^-$                                         | -9.0  |
| #17 | $[\text{Li}]^+ \left[ \begin{array}{c} \text{H} \\ \text{B} \\ \text{C}_5\text{H}_9 \end{array} \right]^-$                                            | -9.3  |
| #18 | $[\text{Li}]^+ \left[ \begin{array}{c} \text{H} \\ \text{B} \\ \text{n-Bu} \end{array} \right]^-$                                                     | -12.3 |
| #19 | $\begin{array}{c} \text{H} \text{---} \text{B} \\ \text{H} \text{---} \text{B} \end{array}$                                                           | 28.5  |
| #20 | $\begin{array}{c} \text{B} \\ \text{OH} \end{array}$                                                                                                  | 56.6  |
| #21 | $\begin{array}{c} \text{B} \text{---} \text{O} \text{---} \text{B} \end{array}$                                                                       | 55.2  |
| #22 | $\begin{array}{c} \text{AcO} \text{---} \text{B} \\ \text{---} \end{array}$                                                                           | 57.7  |
| #23 | $\begin{array}{c} \text{F}_3\text{C} \\ \text{---} \text{O} \text{---} \text{B} \text{Et}_2 \\ \text{---} \text{O} \\ \text{F}_3\text{C} \end{array}$ | 20.3  |

|     |                                                                                     |       |
|-----|-------------------------------------------------------------------------------------|-------|
| #24 | 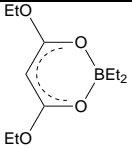   | 15.0  |
| #25 |    | 14.2  |
| #26 |    | 14.5  |
| #27 |    | 10.8  |
| #28 |    | -1.2  |
| #29 |   | 4.6   |
| #30 |  | 5.7   |
| #31 | $[\text{Li}]^+ [\text{Cyclopentane-BH}_2]^-$                                        | -20.2 |
| #32 | $[\text{Li}]^+ [\text{Cyclopentane-BH}_3]^-$                                        | -26.3 |
| #33 | $[\text{Na}]^+ [\text{N}\equiv\text{CBH}_3]^-$                                      | -44.2 |
| #34 | $[\text{Li}]^+ [\text{PhBH}_3]^-$                                                   | -26.0 |
| #35 | $[\text{Li}]^+ [\text{MeBH}_3]^-$                                                   | -30.9 |
| #36 | $[\text{Li}]^+ [\text{n-C}_6\text{H}_{13}\text{BH}_3]^-$                            | -28.1 |

<sup>a</sup>The experimental data were retrieved from the online database compiled by the Cole research group: <http://www.chemistry.sdsu.edu/research/BNMR>

## 1.2 The linear correlations between the computed isotropic shielding constants and the experimental chemical shifts

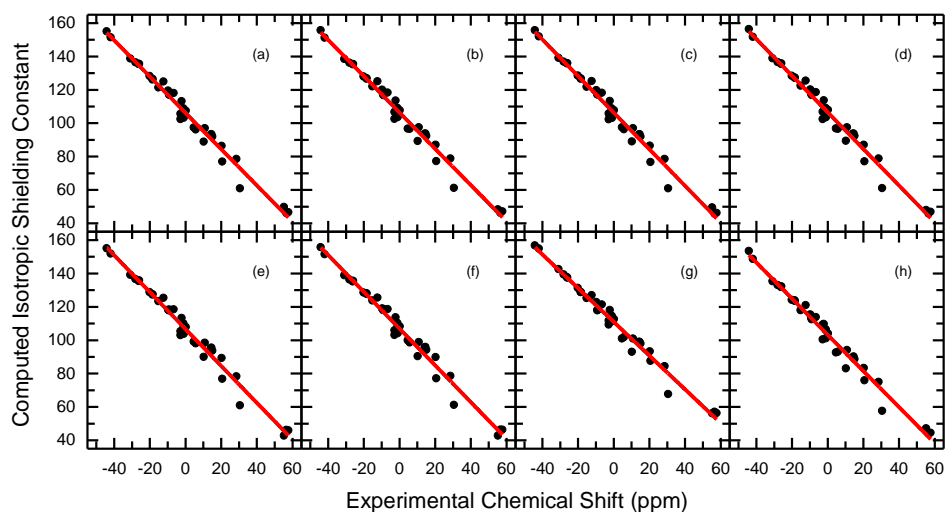

**Figure S1.** Linear correlation between experimental chemical shifts and calculated shielding constants in THF with the SMD solvent model for NMR calculation. a. Method 1; b. Method 2; c. Method 3; d. Method 4; e. Method 5; f. Method 6; g. Method 7; h. Method 8.

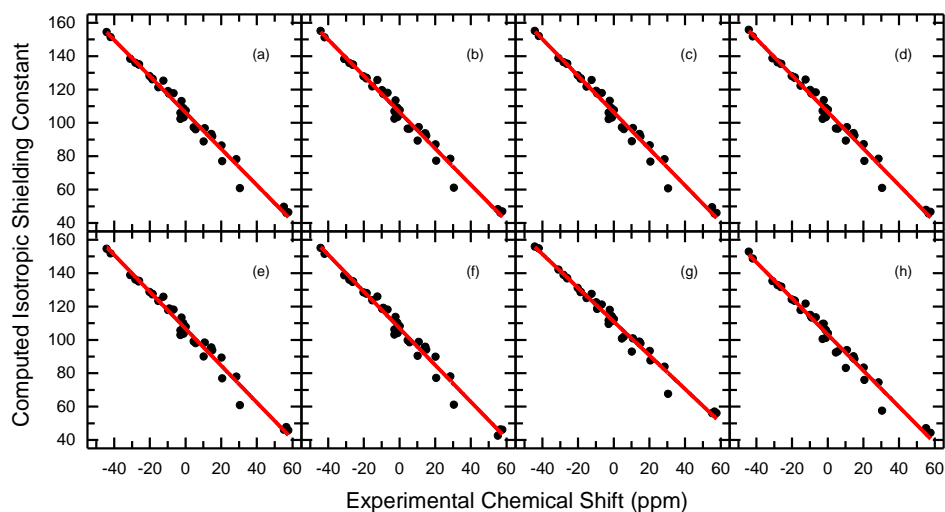

**Figure S2.** Linear correlation between experimental chemical shifts and calculated shielding constants in THF with the CPCM solvent model for NMR calculation. a. Method 1; b. Method 2; c. Method 3; d. Method 4; e. Method 5; f. Method 6; g. Method 7; h. Method 8.

**Table S2.** The adopted eight methods for calculating  $^{11}\text{B}$  isotropic shielding constants and the fitted empirical scaling parameters (slope and intercept) in THF with both SMD and CPCM models for NMR calculation.

| Geo. opt (in vacuo)   | NMR (with the solvent model) | Scaling Factors (SMD) |           | Scaling Factors (CPCM) |           |
|-----------------------|------------------------------|-----------------------|-----------|------------------------|-----------|
|                       |                              | Slope                 | Intercept | Slope                  | Intercept |
| 1 B3LYP/6-31+G(d,p)   | mPW1PW91/6-311+G(2d,p)       | -1.0869               | 106.19    | -1.0851                | 106.02    |
| 2 B3LYP/6-311+G(2d,p) | mPW1PW91/6-311+G(2d,p)       | -1.0877               | 106.40    | -1.0867                | 106.25    |
| 3 B3LYP/6-31+G(d,p)   | PBE0/6-311+G(2d,p)           | -1.0959               | 106.32    | -1.0941                | 106.15    |

|   |                     |                        |         |        |         |        |
|---|---------------------|------------------------|---------|--------|---------|--------|
| 4 | B3LYP/6-311+G(2d,p) | PBE0/6-311+G(2d,p)     | -1.0967 | 106.53 | -1.0956 | 106.37 |
| 5 | M062X/6-31+G(d,p)   | mPW1PW91/6-311+G(2d,p) | -1.1050 | 106.67 | -1.0903 | 106.65 |
| 6 | M062X/6-311+G(2d,p) | mPW1PW91/6-311+G(2d,p) | -1.1014 | 106.94 | -1.1003 | 106.79 |
| 7 | B3LYP/cc-pvdz       | B3LYP/cc-pvdz          | -1.0104 | 110.96 | -1.0078 | 110.79 |
| 8 | B3LYP/cc-pvtz       | B3LYP/cc-pvtz          | -1.0824 | 103.20 | -1.0823 | 103.09 |

### 1.3 Performances of the linear regression models

**Table S3.** The performances of the eight fitted empirical scaling factors in **Table S2**.

|   | Geo. Opt (in vacuo) | NMR (with the solvent model) | R <sup>2</sup> (SMD) <sup>a</sup> | RMSD (SMD) <sup>b</sup> | R <sup>2</sup> (CPCM) <sup>c</sup> | RMSD(CPCM) <sup>d</sup> |
|---|---------------------|------------------------------|-----------------------------------|-------------------------|------------------------------------|-------------------------|
| 1 | B3LYP/6-31+G(d,p)   | mPW1PW91/6-311+G(2d,p)       | 0.9812                            | 3.40                    | 0.9813                             | 3.39                    |
| 2 | B3LYP/6-311+G(2d,p) | mPW1PW91/6-311+G(2d,p)       | 0.9811                            | 3.40                    | 0.9812                             | 3.40                    |
| 3 | B3LYP/6-31+G(d,p)   | PBE0/6-311+G(2d,p)           | 0.9812                            | 3.40                    | 0.9813                             | 3.39                    |
| 4 | B3LYP/6-311+G(2d,p) | PBE0/6-311+G(2d,p)           | 0.9811                            | 3.41                    | 0.9812                             | 3.40                    |
| 5 | M062X/6-31+G(d,p)   | mPW1PW91/6-311+G(2d,p)       | 0.9807                            | 3.45                    | 0.9803                             | 3.48                    |
| 6 | M062X/6-311+G(2d,p) | mPW1PW91/6-311+G(2d,p)       | 0.9801                            | 3.50                    | 0.9800                             | 3.50                    |
| 7 | B3LYP/cc-pvdz       | B3LYP/cc-pvdz                | 0.9811                            | 3.41                    | 0.9815                             | 3.37                    |
| 8 | B3LYP/cc-pvtz       | B3LYP/cc-pvtz                | 0.9807                            | 3.45                    | 0.9808                             | 3.44                    |

<sup>a</sup>  $R^2$  is the coefficient of determination for the linear regression for the models with the SMD model (a) and the CPCM model (c), respectively. <sup>b</sup>  $RMSD$  is the root mean square deviation for the predicted chemical shifts with respect to their respective experimental values (in ppm).

### 1.4 Detailed error analyses for the test set for Method 5 with both SMD and CPCM models

**Table S4.** Errors between experimental and predicted <sup>11</sup>B NMR chemical shifts (in ppm) for molecules listed in **Table S1** based on Method 5 using both SMD and CPCM solvent models.

| Molecule | Exptl. $\delta$ (ppm) in THF | Calculated Isotropic <sup>a</sup> | Pred. $\delta$ (ppm) <sup>b</sup> | Pred. <sup>b</sup> - Exptl. | Calculated Isotropic <sup>c</sup> | Pred. $\delta$ (ppm) <sup>d</sup> | Pred. <sup>d</sup> - Exptl. |
|----------|------------------------------|-----------------------------------|-----------------------------------|-----------------------------|-----------------------------------|-----------------------------------|-----------------------------|
| 1        | -2.8                         | 102.95                            | 3.36                              | 6.16                        | 102.86                            | 3.48                              | 6.28                        |
| 2        | -0.9                         | 103.76                            | 2.63                              | 3.53                        | 103.70                            | 2.71                              | 3.61                        |
| 3        | 10.2                         | 90.04                             | 15.05                             | 4.85                        | 90.00                             | 15.27                             | 5.07                        |
| 4        | -1.1                         | 108.14                            | -1.33                             | -0.23                       | 107.50                            | -0.78                             | 0.32                        |
| 5        | -42                          | 151.85                            | -40.89                            | 1.11                        | 151.80                            | -41.41                            | 0.59                        |
| 6        | 0.2                          | 107.91                            | -1.12                             | -1.32                       | 107.80                            | -1.05                             | -1.25                       |
| 7        | 30.5                         | 60.97                             | 41.36                             | 10.86                       | 60.84                             | 42.01                             | 11.51                       |
| 8        | 20.6                         | 76.84                             | 27.00                             | 6.40                        | 76.86                             | 27.32                             | 6.72                        |
| 9        | -15.2                        | 123.36                            | -15.11                            | 0.09                        | 123.22                            | -15.20                            | 0.00                        |
| 10       | -18.5                        | 127.41                            | -18.77                            | -0.27                       | 127.25                            | -18.90                            | -0.40                       |
| 11       | -18.4                        | 127.54                            | -18.89                            | -0.49                       | 127.44                            | -19.07                            | -0.67                       |
| 12       | -2.2                         | 113.38                            | -6.07                             | -3.87                       | 113.26                            | -6.07                             | -3.87                       |

|                          |       |        |        |       |        |        |       |
|--------------------------|-------|--------|--------|-------|--------|--------|-------|
| 13                       | -2.8  | 105.33 | 1.21   | 4.01  | 105.57 | 0.99   | 3.79  |
| 14                       | -6.7  | 118.53 | -10.73 | -4.03 | 118.07 | -10.48 | -3.78 |
| 15                       | -9.7  | 118.26 | -10.49 | -0.79 | 117.85 | -10.27 | -0.57 |
| 16                       | -9    | 118.29 | -10.52 | -1.52 | 118.72 | -11.07 | -2.07 |
| 17                       | -9.3  | 117.77 | -10.05 | -0.75 | 118.14 | -10.53 | -1.23 |
| 18                       | -12.3 | 125.37 | -16.92 | -4.62 | 125.74 | -17.51 | -5.21 |
| 19                       | 28.5  | 78.29  | 25.68  | -2.82 | 77.88  | 26.38  | -2.12 |
| 20                       | 56.6  | 46.25  | 54.68  | -1.92 | 47.76  | 54.01  | -2.59 |
| 21                       | 55.2  | 42.83  | 57.77  | 2.57  | 46.09  | 55.54  | 0.34  |
| 22                       | 57.7  | 45.95  | 54.95  | -2.75 | 45.71  | 55.89  | -1.81 |
| 23                       | 20.3  | 89.28  | 15.74  | -4.56 | 89.30  | 15.92  | -4.38 |
| 24                       | 15    | 93.77  | 11.68  | -3.32 | 93.66  | 11.91  | -3.09 |
| 25                       | 14.2  | 95.13  | 10.44  | -3.76 | 94.92  | 10.75  | -3.45 |
| 26                       | 14.5  | 95.56  | 10.06  | -4.44 | 95.45  | 10.27  | -4.23 |
| 27                       | 10.8  | 98.45  | 7.44   | -3.36 | 98.31  | 7.65   | -3.15 |
| 28                       | -1.2  | 110.13 | -3.13  | -1.93 | 110.01 | -3.08  | -1.88 |
| 29                       | 4.6   | 99.19  | 6.77   | 2.17  | 98.98  | 7.03   | 2.43  |
| 30                       | 5.7   | 98.08  | 7.77   | 2.07  | 98.01  | 7.92   | 2.22  |
| 31                       | -20.2 | 128.86 | -20.08 | 0.12  | 128.64 | -20.17 | 0.03  |
| 32                       | -26.3 | 135.50 | -26.09 | 0.21  | 134.91 | -25.92 | 0.38  |
| 33                       | -44.2 | 155.09 | -43.82 | 0.38  | 154.50 | -43.88 | 0.32  |
| 34                       | -26   | 135.83 | -26.39 | -0.39 | 135.28 | -26.26 | -0.26 |
| 35                       | -30.9 | 139.18 | -29.42 | 1.48  | 138.82 | -29.51 | 1.39  |
| 36                       | -28.1 | 136.62 | -27.10 | 1.00  | 136.12 | -27.03 | 1.07  |
| <b>RMSDs<sup>e</sup></b> |       |        |        | 3.45  |        |        | 3.48  |

<sup>a</sup>The isotropic shielding constants are calculated via Method 5 with the SMD solvent model.

<sup>b</sup>The scaling factors were fitted based on Method 5 (slope: -1.1050, intercept: -106.67).

<sup>c</sup>The isotropic shielding constants are calculated via Method 5 with the CPCM solvent model.

<sup>d</sup>The scaling factors were fitted based on Method 5 (slope: -1.0903, intercept: -106.65).

<sup>e</sup>Root-mean-square deviations.

**Table S5.** Errors between experimental and predicted <sup>11</sup>B NMR chemical shifts (in ppm) for molecules listed in **Table S1** based on Method 7 using both SMD and CPCM solvent models.

| Molecule | Exptl. $\delta$ (ppm) in THF | Calculated Isotropic <sup>a</sup> | Pred. $\delta$ (ppm) <sup>b</sup> | Pred. <sup>b</sup> - Exptl. | Calculated Isotropic <sup>c</sup> | Pred. $\delta$ (ppm) <sup>d</sup> | Pred. <sup>d</sup> - Exptl. |
|----------|------------------------------|-----------------------------------|-----------------------------------|-----------------------------|-----------------------------------|-----------------------------------|-----------------------------|
| 1        | -2.8                         | 111.67                            | -0.71                             | 2.09                        | 111.54                            | -0.75                             | 2.05                        |
| 2        | -0.9                         | 111.34                            | -0.38                             | 0.52                        | 111.26                            | -0.46                             | 0.44                        |
| 3        | 10.2                         | 93.00                             | 17.78                             | 7.58                        | 92.91                             | 17.74                             | 7.54                        |
| 4        | -1.1                         | 114.70                            | -3.70                             | -2.60                       | 114.09                            | -3.27                             | -2.17                       |
| 5        | -42                          | 154.95                            | -43.54                            | -1.54                       | 154.74                            | -43.61                            | -1.61                       |
| 6        | 0.2                          | 112.60                            | -1.62                             | -1.82                       | 112.44                            | -1.64                             | -1.84                       |
| 7        | 30.5                         | 67.67                             | 42.84                             | 12.34                       | 67.58                             | 42.88                             | 12.38                       |
| 8        | 20.6                         | 87.64                             | 23.08                             | 2.48                        | 87.60                             | 23.01                             | 2.41                        |
| 9        | -15.2                        | 125.18                            | -14.07                            | 1.13                        | 125.01                            | -14.11                            | 1.09                        |
| 10       | -18.5                        | 128.77                            | -17.62                            | 0.88                        | 128.56                            | -17.63                            | 0.87                        |
| 11       | -18.4                        | 128.84                            | -17.69                            | 0.71                        | 128.74                            | -17.81                            | 0.59                        |
| 12       | -2.2                         | 118.04                            | -7.01                             | -4.81                       | 117.93                            | -7.08                             | -4.88                       |
| 13       | -2.8                         | 109.28                            | 1.66                              | 4.46                        | 109.53                            | 1.25                              | 4.05                        |
| 14       | -6.7                         | 121.37                            | -10.30                            | -3.60                       | 121.12                            | -10.25                            | -3.55                       |
| 15       | -9.7                         | 122.84                            | -11.75                            | -2.05                       | 122.49                            | -11.61                            | -1.91                       |
| 16       | -9                           | 117.89                            | -6.86                             | 2.14                        | 118.93                            | -8.08                             | 0.92                        |
| 17       | -9.3                         | 117.95                            | -6.91                             | 2.39                        | 118.49                            | -7.64                             | 1.66                        |
| 18       | -12.3                        | 126.93                            | -15.81                            | -3.51                       | 127.46                            | -16.55                            | -4.25                       |
| 19       | 28.5                         | 84.40                             | 26.29                             | -2.21                       | 83.93                             | 26.65                             | -1.85                       |
| 20       | 56.6                         | 57.13                             | 53.28                             | -3.32                       | 56.98                             | 53.39                             | -3.21                       |
| 21       | 55.2                         | 56.20                             | 54.20                             | -1.00                       | 56.01                             | 54.36                             | -0.84                       |
| 22       | 57.7                         | 56.38                             | 54.01                             | -3.69                       | 56.12                             | 54.25                             | -3.45                       |
| 23       | 20.3                         | 93.27                             | 17.51                             | -2.79                       | 93.27                             | 17.38                             | -2.92                       |
| 24       | 15                           | 97.98                             | 12.85                             | -2.15                       | 97.87                             | 12.82                             | -2.18                       |
| 25       | 14.2                         | 98.94                             | 11.89                             | -2.31                       | 98.72                             | 11.97                             | -2.23                       |
| 26       | 14.5                         | 99.01                             | 11.83                             | -2.67                       | 98.88                             | 11.82                             | -2.68                       |

|                          |       |        |        |       |        |        |       |
|--------------------------|-------|--------|--------|-------|--------|--------|-------|
| <b>27</b>                | 10.8  | 100.99 | 9.87   | -0.93 | 100.80 | 9.91   | -0.89 |
| <b>28</b>                | -1.2  | 114.24 | -3.25  | -2.05 | 114.12 | -3.31  | -2.11 |
| <b>29</b>                | 4.6   | 101.03 | 9.83   | 5.23  | 100.78 | 9.93   | 5.33  |
| <b>30</b>                | 5.7   | 101.84 | 9.03   | 3.33  | 101.73 | 8.99   | 3.29  |
| <b>31</b>                | -20.2 | 131.31 | -20.14 | 0.06  | 131.12 | -20.17 | 0.03  |
| <b>32</b>                | -26.3 | 137.88 | -26.64 | -0.34 | 137.21 | -26.22 | 0.08  |
| <b>33</b>                | -44.2 | 156.81 | -45.38 | -1.18 | 155.88 | -44.74 | -0.54 |
| <b>34</b>                | -26   | 137.43 | -26.20 | -0.20 | 136.71 | -25.72 | 0.28  |
| <b>35</b>                | -30.9 | 142.62 | -31.33 | -0.43 | 142.12 | -31.09 | -0.19 |
| <b>36</b>                | -28.1 | 139.47 | -28.22 | -0.12 | 138.85 | -27.84 | 0.26  |
| <b>RMSDs<sup>e</sup></b> |       |        |        | 3.41  |        |        | 3.37  |

<sup>a</sup>The isotropic shielding constants are calculated via Method 7 with the SMD solvent model.

<sup>b</sup>The scaling factors were fitted based on Method 5 (slope: -1.0104, intercept: -110.96).

<sup>c</sup>The isotropic shielding constants are calculated via Method 7 with the CPCM solvent model.

<sup>d</sup>The scaling factors were fitted based on Method 5 (slope: -1.0078, intercept: -110.79).

<sup>e</sup>Root-mean-square deviations.

## 1.5 Effects of the geometries on the single point NMR calculations

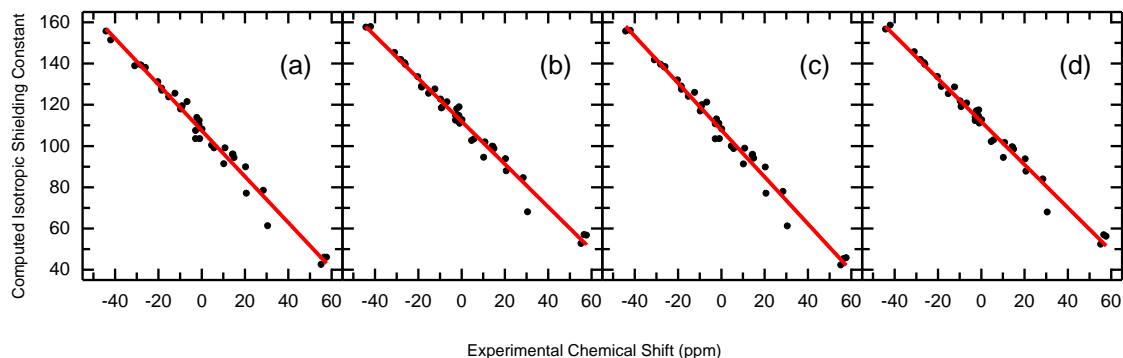

**Figure S3.** Linear correlation between experimental chemical shifts and calculated shielding constants in THF for a. Method 5 with the SMD solvent model in geometry optimisation step; b. Method 7 with the SMD solvent model in geometry optimisation step; c. Method 5 with the CPCM solvent model in geometry optimisation step; d. Method 7 with the CPCM solvent model in geometry optimisation step.

## 2. Application of the developed linear regression models

### 2.1 Boron-hydrogen compounds

**Table S6.** The boron-hydrogen compounds and their experimental NMR chemical shifts.

| Compound        | Structure | Exptl. $\delta$ (ppm) |
|-----------------|-----------|-----------------------|
| BH <sub>3</sub> |           | B-1 = 86 [1]          |



|             |                                                                                     |                                               |
|-------------|-------------------------------------------------------------------------------------|-----------------------------------------------|
| $B_2H_6$    |    | B-1,2 = -16.6 [2]                             |
| $B_2H_7^-$  |    | B-1,2 = -24.6 [3]                             |
| $B_3H_8^-$  |    | B-1,2,3 = -30.4 [4]                           |
| $B_4H_9^-$  |    | B-1 = -54.5<br>B-2,4 = -10.2<br>B-3 = 0.8 [5] |
| $B_4H_{10}$ |   | B-6,7 = -6.9<br>B-12 = -41.8 [6]              |
| $B_5H_9$    |  | B-1 = -53.1<br>B-2-5 = -13.4 [7]              |
| $B_5H_{11}$ |  | B-1-5 = -55.3 [8]                             |
| $B_6H_{10}$ |  | B-3-6 = 18.6<br>B-2 = -6.5<br>B-1 = -51.8 [9] |

$B_6H_{12}$

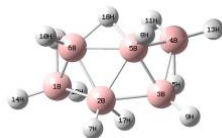

B-1, 4 = 22.6  
B-3, 6 = 7.9 [10]

$B_8H_8^{2-}$

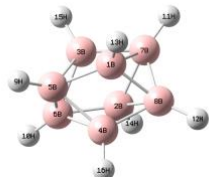

B-1-8 = -6.8 [11]

$B_9H_9^{2-}$

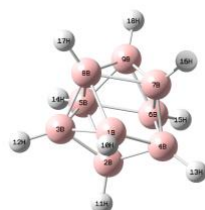

B-3,4,9 = -2.9  
B- 1,2,5-8 = -20.5 [12]

$B_{10}H_{10}^{2-}$

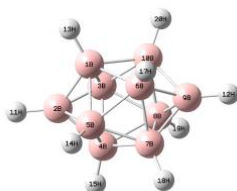

B-1,3-8,10:  $\delta^a = -30.9$   
B- 2,9:  $\delta^b = 0.9$  [12]

$B_{10}H_{14}$

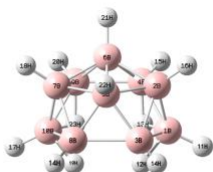

B-5,6 = 13.5  
B-1,10 = 10.7  
B-3,4,8,9 = 1.6  
B-2,7 = -35.2 [13]

$B_{11}H_{11}^{2-}$

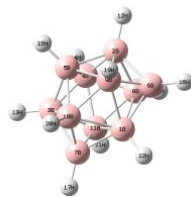

B-1-11 = -16.9 [14]

$B_{12}H_{12}^{2-}$

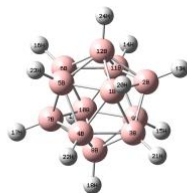

B-1-12 = -15.6 [12]

**Table S7.** The differences between the predicted and experimental  $^{11}\text{B}$  chemical shifts for boron-hydrogen compounds based on Method 5 with both the SMD and CPCM models.

|    | Boron-hydrogen compounds                      | Position   | Exptl. Value (ppm) | Linear scaled. value <sup>a</sup> (ppm) | Scaled-Exptl. <sup>a</sup> (ppm) | Linear scaled. value <sup>b</sup> (ppm) | Scaled-Exptl. <sup>b</sup> (ppm) |
|----|-----------------------------------------------|------------|--------------------|-----------------------------------------|----------------------------------|-----------------------------------------|----------------------------------|
| 1  | BH <sub>3</sub>                               | B-1        | 86.0               | 84.22                                   | -1.78                            | 85.34                                   | -0.66                            |
| 2  | B <sub>2</sub> H <sub>6</sub>                 | B-1,2      | 16.6               | 17.84                                   | 1.24                             | 18.06                                   | 1.46                             |
| 3  | B <sub>2</sub> H <sub>7</sub> <sup>-</sup>    | B-1,2      | -24.6              | -24.51                                  | 0.09                             | -24.86                                  | -0.26                            |
| 4  | B <sub>3</sub> H <sub>8</sub> <sup>-</sup>    | B-1,2,3    | -30.4              | -10.92, -43.05                          | 3.41 <sup>cγ</sup>               | -11.08, -43.65                          | 3.03 <sup>γ</sup>                |
| 5  | B <sub>4</sub> H <sub>9</sub> <sup>-</sup>    | B-1        | -54.5              | -54.41                                  | 0.09                             | -55.16                                  | -0.66                            |
|    |                                               | B-2,4      | -10.2              | -11.65                                  | -1.45                            | -11.83                                  | -1.63                            |
|    |                                               | B-3        | 0.8                | 0.06                                    | -0.74                            | 0.05                                    | -0.75                            |
| 6  | B <sub>4</sub> H <sub>10</sub>                | B-6,7      | -6.9               | -6.85                                   | 0.05                             | -6.97                                   | -0.07                            |
|    |                                               | B-12       | -41.8              | -40.18                                  | 1.62                             | -40.74                                  | 1.06                             |
|    |                                               |            |                    |                                         |                                  |                                         |                                  |
| 7  | B <sub>5</sub> H <sub>9</sub>                 | B-1        | -13.4              | -14.17                                  | -0.77                            | -14.38                                  | -0.98                            |
|    |                                               | B-2,5      | -53.1              | -50.65                                  | 2.45                             | -51.35                                  | 1.75                             |
| 8  | B <sub>5</sub> H <sub>11</sub>                | B-1,5      | -55.3              | -51.38                                  | 3.92                             | -52.09                                  | 3.21                             |
| 9  | B <sub>6</sub> H <sub>10</sub>                | B-3,6      | 18.6               | 14.77                                   | -3.83                            | 14.95                                   | -3.65                            |
|    |                                               | B-2        | -6.5               | -8.23                                   | -1.73                            | -8.36                                   | -1.86                            |
|    |                                               | B-1        | -51.8              | -48.95                                  | 2.85                             | -49.63                                  | 2.17                             |
| 10 | B <sub>6</sub> H <sub>12</sub>                | B-1,4      | 22.6               | 22.56                                   | -0.04                            | 22.85                                   | 0.25                             |
|    |                                               | B-3,6      | 7.9                | 11.04                                   | 3.14                             | 11.17                                   | 3.27                             |
|    |                                               |            |                    |                                         |                                  |                                         |                                  |
| 11 | B <sub>8</sub> H <sub>8</sub> <sup>2-</sup>   | B-1,8      | -6.8               | -1.55                                   | 5.25                             | -1.59                                   | 5.21                             |
| 12 | B <sub>9</sub> H <sub>9</sub> <sup>2-</sup>   | B-3,4,9    | -2.9               | -3.60                                   | -0.70                            | -3.67                                   | -0.77                            |
|    |                                               | B-1,2,5-8  | -20.5              | -21.98                                  | -1.48                            | -22.30                                  | -1.80                            |
|    |                                               |            |                    |                                         |                                  |                                         |                                  |
| 13 | B <sub>10</sub> H <sub>10</sub> <sup>2-</sup> | B-1,3-8,10 | -30.9              | -28.38                                  | 2.52                             | -28.78                                  | 2.12                             |
|    |                                               | B-2,9      | 0.9                | -2.47                                   | -3.37                            | -2.52                                   | -3.42                            |
| 14 | B <sub>10</sub> H <sub>14</sub>               | B-5,6      | 13.5               | 12.66                                   | -0.84                            | 12.81                                   | -0.69                            |
|    |                                               | B-1,10     | 10.7               | 8.18                                    | -2.52                            | 8.27                                    | -2.43                            |
|    |                                               | B-3,4,8,9  | 1.6                | 0.65                                    | -0.95                            | 0.64                                    | -0.96                            |
|    |                                               | B-2,7      | -35.2              | -33.14                                  | 2.06                             | -33.60                                  | 1.60                             |
| 15 | B <sub>11</sub> H <sub>11</sub> <sup>2-</sup> | B-1,11     | -16.9              | -17.10                                  | -0.20                            | -17.35                                  | -0.45                            |
| 16 | B <sub>12</sub> H <sub>12</sub> <sup>2-</sup> | B-1,12     | -15.6              | -13.82                                  | 1.78                             | -14.03                                  | 1.57                             |

<sup>a b</sup>The predicted chemical shifts by Method 5 with scaling factors of SMD and CPCM sets, respectively.

<sup>c</sup> For B<sub>3</sub>H<sub>8</sub><sup>-</sup> we got two different chemical shifts for boron atoms, and use the averaged value to compare with exptl. value.

**Table S8.** The differences between the predicted and experimental  $^{11}\text{B}$  chemical shifts for boron-hydrogen compounds based on Method 7 with both the SMD and CPCM sets.

|    | Boron-hydrogen compounds                    | Position  | Exptl. Value (ppm) | Linear scaled. value <sup>a</sup> (ppm) | Scaled-Exptl. <sup>a</sup> (ppm) | Linear scaled. value <sup>b</sup> (ppm) | Scaled-Exptl. <sup>b</sup> (ppm) |
|----|---------------------------------------------|-----------|--------------------|-----------------------------------------|----------------------------------|-----------------------------------------|----------------------------------|
| 1  | BH <sub>3</sub>                             | B-1       | 86.0               | 83.16                                   | -2.84                            | 83.20                                   | -2.80                            |
| 2  | B <sub>2</sub> H <sub>6</sub>               | B-1,2     | 16.6               | 15.98                                   | -0.62                            | 15.85                                   | -0.75                            |
| 3  | B <sub>2</sub> H <sub>7</sub> <sup>-</sup>  | B-1,2     | -24.6              | -23.48                                  | 1.12                             | -23.71                                  | 0.89                             |
| 4  | B <sub>3</sub> H <sub>8</sub> <sup>-</sup>  | B-1,2,3   | -30.4              | -11.34, -44.97                          | 2.24 <sup>γc</sup>               | -11.54, -45.25                          | 2.00 <sup>γ</sup>                |
| 5  | B <sub>4</sub> H <sub>9</sub> <sup>-</sup>  | B-1       | -54.5              | -56.46                                  | -1.96                            | -56.77                                  | -2.27                            |
|    |                                             | B-2,4     | -10.2              | -12.72                                  | -2.52                            | -12.92                                  | -2.72                            |
|    |                                             | B-3       | 0.8                | -1.41                                   | -2.21                            | -1.58                                   | -2.38                            |
| 6  | B <sub>4</sub> H <sub>10</sub>              | B-6,7     | -6.9               | -7.51                                   | -0.61                            | -7.70                                   | -0.80                            |
|    |                                             | B-12      | -41.8              | -42.75                                  | -0.95                            | -43.03                                  | -1.23                            |
| 7  | B <sub>5</sub> H <sub>9</sub>               | B-1       | -13.4              | -15.47                                  | -2.07                            | -15.68                                  | -2.28                            |
|    |                                             | B-2,5     | -53.1              | -55.75                                  | -2.65                            | -56.06                                  | -2.96                            |
| 8  | B <sub>5</sub> H <sub>11</sub>              | B-1,5     | -55.3              | -53.43                                  | 1.87                             | -53.74                                  | 1.56                             |
| 9  | B <sub>6</sub> H <sub>10</sub>              | B-3,6     | 18.6               | 14.98                                   | -3.62                            | 14.85                                   | -3.75                            |
|    |                                             | B-2       | -6.5               | -11.13                                  | -4.63                            | -11.33                                  | -4.83                            |
|    |                                             | B-1       | -51.8              | -51.64                                  | 0.16                             | -51.94                                  | -0.14                            |
| 10 | B <sub>6</sub> H <sub>12</sub>              | B-1,4     | 22.6               | 20.43                                   | -2.17                            | 20.32                                   | -2.28                            |
|    |                                             | B-3,6     | 7.9                | 10.15                                   | 2.25                             | 10.01                                   | 2.11                             |
|    |                                             |           |                    |                                         |                                  |                                         |                                  |
| 11 | B <sub>8</sub> H <sub>8</sub> <sup>2-</sup> | B-1,8     | -6.8               | -3.60                                   | 3.20                             | -3.78                                   | 3.02                             |
| 12 | B <sub>9</sub> H <sub>9</sub> <sup>2-</sup> | B-3,4,9   | -2.9               | -6.40                                   | -3.50                            | -6.59                                   | -3.69                            |
|    |                                             | B-1,2,5-8 | -20.5              | -22.22                                  | -1.72                            | -22.45                                  | -1.95                            |

|    |                     |            |       |        |       |        |       |
|----|---------------------|------------|-------|--------|-------|--------|-------|
| 13 | $B_{10}H_{10}^{2-}$ | B-1,3-8,10 | -30.9 | -28.85 | 2.05  | -29.10 | 1.80  |
|    |                     | B-2,9      | 0.9   | -3.18  | -4.08 | -3.36  | -4.26 |
| 14 | $B_{10}H_{14}$      | B-5,6      | 13.5  | 12.20  | -1.30 | 12.06  | -1.44 |
|    |                     | B-1,10     | 10.7  | 7.62   | -3.08 | 7.47   | -3.23 |
|    |                     | B-3,4,8,9  | 1.6   | 0.42   | -1.18 | 0.25   | -1.35 |
|    |                     | B-2,7      | -35.2 | -34.95 | 0.25  | -35.21 | -0.01 |
| 15 | $B_{11}H_{11}^{2-}$ | B-1-11     | -16.9 | -17.63 | -0.73 | -17.85 | -0.95 |
| 16 | $B_{12}H_{12}^{2-}$ | B-1-12     | -15.6 | -14.62 | 0.98  | -14.83 | 0.77  |

<sup>a b</sup>The predicted chemical shifts by Method 7 with scaling factors of SMD and CPCM sets, respectively.

<sup>c</sup> For  $B_3H_8^-$ , we got two different chemical shifts for boron atoms, and use the averaged value to compare with exptl. value.

## 2.2 Other Boron containing compounds

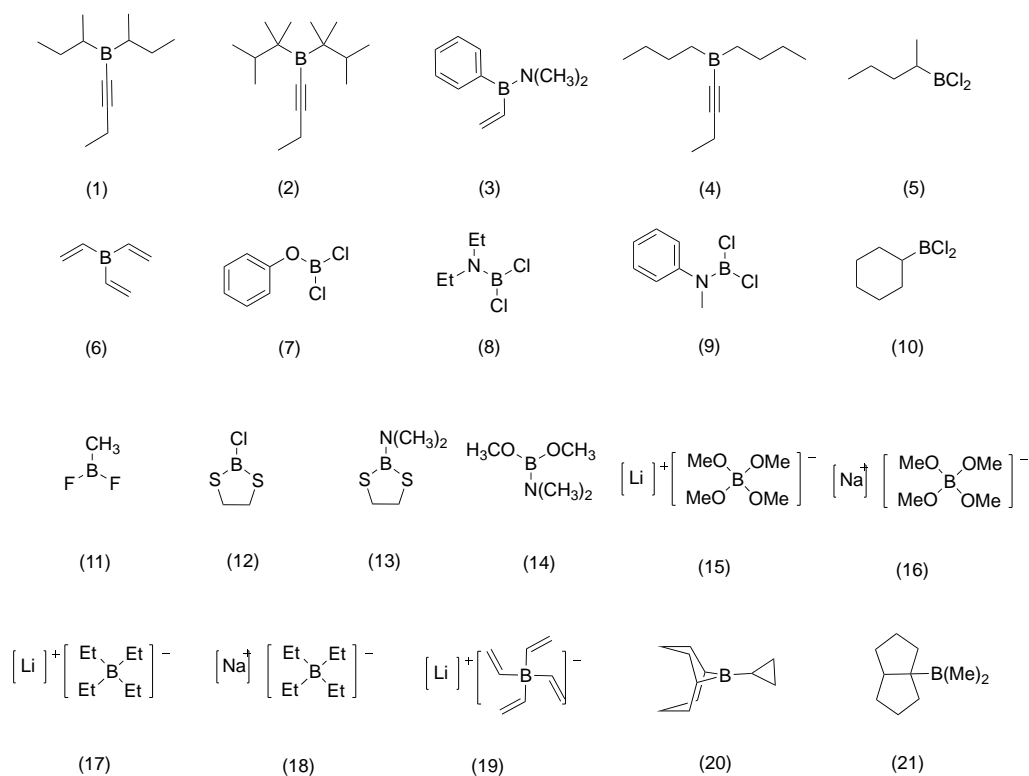

**Figure S4.** Other boron containing molecules. The experimental data were retrieved from the online database compiled by the Cole research group:

<http://www.chemistry.sdsu.edu/research/BNMR>

**Table S9.** The differences between the predicted and experimental  $^{11}\text{B}$  chemical shifts for boron containing molecules listed in Figure S4 based on Method 5 with both the SMD and CPCM sets.

|    | Exptl.                    | Exptl. Value (ppm) | Linear scaled.<br>value <sup>a</sup> (ppm) | Scaled-Exptl. <sup>a</sup><br>(ppm) | Linear scaled.<br>value <sup>b</sup> (ppm) | Scaled-Exptl. <sup>b</sup><br>(ppm) |
|----|---------------------------|--------------------|--------------------------------------------|-------------------------------------|--------------------------------------------|-------------------------------------|
| 1  | in THF                    | 72.2               | 67.32                                      | -4.88                               | 68.22                                      | -3.98                               |
| 2  | in THF                    | 81.1               | 76.99                                      | -4.11                               | 78.67                                      | -2.43                               |
| 3  | neat                      | 40.0               | 37.88                                      | -2.12                               | 38.38                                      | -1.62                               |
| 4  | neat                      | 72.0               | 66.94                                      | -5.06                               | 67.82                                      | -4.18                               |
| 5  | neat                      | 65.3               | 61.98                                      | -3.32                               | 62.80                                      | -2.50                               |
| 6  | neat                      | 55.2               | 51.21                                      | -3.99                               | 51.88                                      | -3.32                               |
| 7  | neat                      | 33.0               | 32.72                                      | -0.28                               | 33.14                                      | 0.14                                |
| 8  | neat                      | 31.6               | 31.76                                      | 0.16                                | 32.17                                      | 0.57                                |
| 9  | neat                      | 30.8               | 32.31                                      | 1.51                                | 32.73                                      | 1.93                                |
| 10 | neat                      | 67.6               | 61.37                                      | -6.23                               | 62.18                                      | -5.42                               |
| 11 | in $\text{CHCl}_3$        | 28.1               | 30.43                                      | 2.33                                | 30.85                                      | 2.75                                |
| 12 | neat                      | 62.7               | 59.53                                      | -3.17                               | 60.32                                      | -2.38                               |
| 13 | neat                      | 45.3               | 43.30                                      | -2.00                               | 43.86                                      | -1.44                               |
| 14 | neat                      | 21.3               | 21.10                                      | -0.20                               | 21.37                                      | 0.07                                |
| 15 | in $\text{CH}_3\text{OH}$ | 21.3               | 3.51                                       | 0.51                                | 3.52                                       | 0.52                                |
| 16 | in $\text{CH}_3\text{OH}$ | 3.0                | 3.07                                       | 0.37                                | 3.11                                       | 0.41                                |
| 17 | in $\text{Et}_2\text{O}$  | 2.7                | -17.29                                     | 0.21                                | -17.41                                     | 0.09                                |
| 18 | in $\text{Et}_2\text{O}$  | -17.5              | -18.08                                     | -1.48                               | -18.25                                     | -1.65                               |
| 19 | in $\text{Et}_2\text{O}$  | -16.6              | -12.91                                     | 3.19                                | -13.19                                     | 2.91                                |
| 20 | in THF                    | -16.1              | 79.37                                      | -4.63                               | 80.59                                      | -3.41                               |
| 21 | in THF                    | 84.0               | 80.70                                      | -1.60                               | 82.17                                      | -0.13                               |

<sup>a b</sup>The predicted chemical shifts by Method 5 with scaling factors of SMD and CPCM sets, respectively. <sup>c</sup>THF was applied as the solvent for NMR calculations for molecules: 1, 2, 20 and 21;  $\text{CH}_3\text{OH}$  was applied as the solvent for NMR calculations for molecules: 11, 15 and 16;  $\text{Et}_2\text{O}$  was applied as the solvent for NMR calculations for molecules: 17, 18 and 19; NMR calculations for molecules: 3-10, 12-14 were conducted *in vacuo*.

**Table S10.** The differences between the predicted and experimental  $^{11}\text{B}$  chemical shifts for boron containing molecules listed in Figure S4 based on Method 7 with both the SMD and CPCM models.

|    | Exptl.                    | Exptl. Value (ppm) | Linear scaled.<br>value <sup>a</sup> (ppm) | Scaled-Exptl. <sup>a</sup><br>(ppm) | Linear scaled.<br>value <sup>b</sup> (ppm) | Scaled-Exptl. <sup>b</sup><br>(ppm) |
|----|---------------------------|--------------------|--------------------------------------------|-------------------------------------|--------------------------------------------|-------------------------------------|
| 1  | in THF                    | 72.2               | 67.89                                      | -4.31                               | 67.94                                      | -4.26                               |
| 2  | in THF                    | 81.1               | 81.02                                      | -0.08                               | 81.83                                      | 0.73                                |
| 3  | neat                      | 40.0               | 38.83                                      | -1.17                               | 38.76                                      | -1.24                               |
| 4  | neat                      | 72.0               | 66.90                                      | -5.10                               | 66.90                                      | -5.10                               |
| 5  | neat                      | 65.3               | 64.78                                      | -0.52                               | 64.77                                      | -0.53                               |
| 6  | neat                      | 55.2               | 51.06                                      | -4.14                               | 51.02                                      | -4.18                               |
| 7  | neat                      | 33.0               | 31.82                                      | -1.18                               | 31.74                                      | -1.26                               |
| 8  | neat                      | 31.6               | 33.38                                      | 1.78                                | 33.29                                      | 1.69                                |
| 9  | neat                      | 30.8               | 32.69                                      | 1.89                                | 32.60                                      | 1.80                                |
| 10 | neat                      | 67.6               | 64.30                                      | -3.30                               | 64.30                                      | -3.30                               |
| 11 | in $\text{CHCl}_3$        | 28.1               | 25.27                                      | -2.83                               | 25.16                                      | -2.94                               |
| 12 | neat                      | 62.7               | 62.98                                      | 0.28                                | 62.97                                      | 0.27                                |
| 13 | neat                      | 45.3               | 45.44                                      | 0.14                                | 45.39                                      | 0.09                                |
| 14 | neat                      | 21.3               | 17.71                                      | -3.59                               | 17.59                                      | -3.71                               |
| 15 | in $\text{CH}_3\text{OH}$ | 21.3               | 1.23                                       | -1.77                               | 1.06                                       | -1.94                               |
| 16 | in $\text{CH}_3\text{OH}$ | 3.0                | 0.86                                       | -1.84                               | 0.72                                       | -1.98                               |
| 17 | in $\text{Et}_2\text{O}$  | 2.7                | -17.03                                     | 0.47                                | -17.07                                     | 0.43                                |
| 18 | in $\text{Et}_2\text{O}$  | -17.5              | -17.92                                     | -1.32                               | -18.10                                     | -1.50                               |
| 19 | in $\text{Et}_2\text{O}$  | -16.6              | -12.52                                     | 3.58                                | -12.79                                     | 3.31                                |
| 20 | in THF                    | -16.1              | 80.94                                      | -3.06                               | 81.29                                      | -2.71                               |
| 21 | in THF                    | 84.0               | 77.75                                      | -4.55                               | 78.24                                      | -4.06                               |

<sup>a b</sup>The predicted chemical shifts by Method 7 with scaling factors of SMD and CPCM sets, respectively.

<sup>13</sup>C-THF was applied as the solvent for NMR calculations for molecules: 1, 2, 20 and 21; CH<sub>3</sub>OH was applied as the solvent for NMR calculations for molecules: 11, 15 and 16; ET<sub>2</sub>O was applied as the solvent for NMR calculations for molecules: 17, 18 and 19; NMR calculations for molecules: 3-10, 12-14 were conducted *in vacuo*.

## References for experimental <sup>11</sup>B chemical shifts:

- (1) Contreras, R.; Wrackmeyer, B. Application of <sup>11</sup>B nuclear magnetic resonance spectroscopy to the study of hydroboration—III. <sup>11</sup>B Nuclear magnetic resonance study of exchange reactions of triorganyl boranes with borane in tetrahydrofuran and dimethyl sulphide. *Spectrochimica Acta*, **1982**, 38, 941-951.
- (2) Onak, T. P.; Shapiro, I. <sup>11</sup>B Nuclear Magnetic Resonance Spectrum of the Diammoniate of Diborane. *The Journal of Chemical Physics*, **1960**, 32, 952-952.
- (3) Hertz, R. K.; Johnson, H. D.; Shore, S. G. Nuclear magnetic resonance spectra of B<sub>2</sub>H<sub>7</sub><sup>-</sup>. Preparation and properties of triphenylmethylphosphonium heptahydrodiborate(1-), [P(C<sub>6</sub>H<sub>5</sub>)<sub>3</sub>CH<sub>3</sub>][B<sub>2</sub>H<sub>7</sub><sup>-</sup>]. *The Journal of Inorganic Chemistry*, **1973**, 12, 1875-1877.
- (4) Huang, Z.; King G.; Chen X.; Hoy J.; Yisgedu T.; Lingam, H. K.; Shore, S G.; Woodward, P. M.; Zhao, J. A Simple and Efficient Way to Synthesize Unsolvated Sodium Octahydrotriborate. *The Journal of Inorganic Chemistry*, **2010**, 49, 8185-8187.
- (5) Rimmel, R. J.; Johnson, H. D.; Jaworiwsky, I. S.; Shore, S. G. Preparation and nuclear magnetic resonance studies of the stereochemically nonrigid anions nonahydrododecaborate (1-), dodecahydrododecaborate (1-), undeca-hydrohexaborate (1-), and dodecahydroheptaborate (1-). Improved syntheses of pentaborane (11) and hexaborane (12). *The Journal of the American Chemical Society*, **1975**, 97, 5395-5403.
- (6) Jaworiwsky, I. S.; Long, J. R.; Barton, L.; Shore, S. G. Directive effects in bridge cleavage reactions of methyl-substituted boron hydrides. 1. Preparation and nuclear magnetic resonance spectra of 3-methylhexaborane (12), 3-methylpentaborane (11), and 1-methyltetraborane (10). *The Journal of Inorganic Chemistry*, **1979**, 18, 56-60.
- (7) Tucker, P. M.; Onak, T.; Leach, J. B. Pentaborane (9) derivatives. II. Synthesis of di- and trisubstituted methyl-, methylchloro-, and methylbromopentaboranes. Detailed nuclear magnetic resonance studies. *The Journal of Inorganic Chemistry*, **1970**, 9, 1430-1441.
- (8) Leach J. B.; Onak, T.; Spielman, J.; Rietz, R. R.; Schaeffer, R.; Sneddon, L. G. Magnetic resonance spectra of tetraborane (10), pentaborane (11), hexaborane (10), and hexaborane (12). *The Journal of Inorganic Chemistry*, **1970**, 9, 2170-2175.
- (9) Greatrex, R.; Greenwood, N. N.; Millikan, M. B.; Rankin, D. W. H.; Robertson, H. E. The molecular structure of hexaborane (12) in the gas phase as determined by electron diffraction. *Dalton Transactions*, **1988**, 2335-2339.
- (10) Jaworiwsky, I. S.; Long, J. R.; Barton, L.; Shore, S. G. Directive effects in bridge cleavage reactions of methyl-substituted boron hydrides. 1. Preparation and nuclear magnetic resonance spectra of 3-methylhexaborane (12), 3-methylpentaborane (11), and 1-methyltetraborane (10). *The Journal of Inorganic Chemistry*, **1979**, 18, 56-60.
- (11) Hermánek, S. Boron-11 NMR spectra of boranes, main-group heteroboranes, and substituted derivatives. Factors influencing chemical shifts of skeletal atoms. *Chemical Reviews*, **1992**, 92, 325-362.
- (12) Hermánek, S. NMR as a tool for elucidation of structures and estimation of electron distribution in boranes and their derivatives. *Inorganica Chimica Acta*, **1999**, 289, 20-44.
- (13) Gaines, D. F.; Nelson, C. K.; Kunz, J. C.; Morris, J. H.; Reed, D. Solvent effects on the boron-11 and proton NMR spectra of decaborane (14), B<sub>10</sub>H<sub>14</sub>. *The Journal of Inorganic Chemistry*, **1984**, 23, 3252-3254.

(14) Yan, Y.; Remhof, A.; Rentsch, D.; Züttel, A. The role of  $\text{MgB}_{12}\text{H}_{12}$  in the hydrogen desorption process of  $\text{Mg}(\text{BH}_4)_2$ . *Chemical Communications*, **2013**, *49*, 5234-5236.
